# Supplementary material for: Differential responses of hard coral Montipora digitata and soft coral Xenia umbellata to nutrient stoichiometry under heat stress
Source: PeerJ. 2025 Nov 13;13:e20273. doi: 10.7717/peerj.20273 (PMC12619941; doi:10.7717/peerj.20273)
Supplement: Supplemental Information 1 [file peerj-13-20273-s001.xlsx]

## Sheet: Tabelle1
Study	Context	Coral species	Soft coral	Length of exposure	Nutrient enrichment	Concentration	N:P ratio	Additional factor	DHW	Dinoflagellate density	Chlorophyll content	Photosynthesis rates	Survival
Muscatine et al. 1989	Exp	Stylophora pistillata		14 days	NH₄	20 μM				Increase	Increase
					PO₄	2 μM				/	/
					NH₄ / PO₄	20 µM / 2 µM	10:1			Increase	Increase
Stambler et al. 1991	Exp	Pocillopora damicornis		28 days	PO₄	0.5 μM				/	/
						2 μM				/	/
				13 days	NH₄	7 µM	70:1			Increase	Increase per SA
						15 μM	150:1			Increase	Increase per SA
					NH₄ / PO₄	15 µM / 0.5 µM	30:1			Increase	Increase per SA
						15 µM / 2 µM	7.5:1			Increase	Increase per SA
Muller-Parker et al. 1994	Exp	Pocillopora damicornis		8 weeks	NH₄	20 μM				Increase	Increase
						50 μM				Increase	/
Snidvong & Kinzie 1994	Exp	Pocillopora damicornis		8 weeks	NH₄	15 μM	50:1				Increase
					PO₄	1.2 μM	0.8:1				/
					NH₄ / PO₄	15 µM / 1.2 µM	12.5:1				/
Marubini & Davis 1996	Exp	Porites porites		40 days	NO₃	1 μM				Decrease	/	/
						5 μM				Increase	Increase	Increase
						20 μM				Increase	Increase	Increase
		Montastrea annularis		30 days	NO₃	1 μM				Decrease	/	/
						5 μM				Increase	Increase	Increase
						20 μM				Increase	Increase	Increase
Ferrier-Pagès et al. 2001	Exp	Stylophora pistillata		3 weeks	NO₃	2 μM				/	/	/
					NO₃ / Iron	2 μM / 6 nM				Increase	/	/
Nordemar et al. 2003	Exp	Porites cylindrica		12 days	NO₃	15 µM				/	/	Decrease in Pgross
								+ 2 °C (additional 2 days)	0.5	/	/	Decrease in Pgross
Schlöder & D'Croz 2004	Exp	Pocillopora damicornis		30 days	NO₃	20.8 µM	30:1			Decrease	Increase
						26.5 µM	38:1	+ 1 °C	4	/	Increase
		Porites lobata		30 days	NO₃	20.8 µM	30:1			/	/
						26.5 µM	38:1	+ 1 °C	4	Decrease (temperature)	/
Kuntz et al. 2005	Exp	Montrastraea annularis		30 days	PO₄/NH₄/NO₃	0.5 µM / 5 µM / 2.5 µM	15:1						/
						2.5 µM / 25 µM / 7.5 µM	13:1						/
		Agaricia tenuifolia		30 days	PO₄/NH₄/NO₃	0.5 µM / 5 µM / 2.5 µM	15:1						/
						2.5 µM / 25 µM / 7.5 µM	13:1						/
		Porites furcata		30 days	PO₄/NH₄/NO₃	0.5 µM / 5 µM / 2.5 µM	15:1						/
						2.5 µM / 25 µM / 7.5 µM	13:1						/
Renegar & Riegl 2005	Exp	Acropora cervicornis		4 weeks	NO₃	5 µM							Decrease
					PO₄	2 µM							Decrease
					NO₃/PO₄	5 µM /2 µM	2.5:1						Decrease
				8 weeks	NO₃	10 µM							Decrease
					PO₄	4 µM							Decrease
					NO₃/PO₄	10 µM / 4 µM	2.5:1						Decrease
Kline et al. 2006	Exp	Montastraea annularis		30 days	PO₄	0.5/2.5/5.0 µM							/
					NO₃	1.0/2.5/6.25 µM							/
					NH₄	0.5/2.5/5.0 µM							/
Tanaka et al. 2007	Exp	Acropora pulchra		5 days	NO₃ / PO₄	5 µM / 0.3 µM	16.5:1			Increase	Increase	Increase in net production rate
				10 days	NO₃ / PO₄	5 µM / 0.3 µM	16.5:1			Increase	Increase	Increase in net production rate
Chauvin et al. 2011	In situ	Acropora muricata		NA (direct collection)	NO₃ / NH₄	4.86 µM / 0.14 µM				Increase	Increase	Increase in photosynthesis
Godinot et al. 2011	Exp	Stylophora pistillata		4 weeks	PO₄	0.5 μM				/	/
						2.5 µM				/	Decrease
				7 weeks	PO₄	0.5 μM				/	Decrease	/
						2.5 µM				/	Decrease	Increase in Fv/Fm
Bednarz et al. 2012	Exp	Xenia sp.	yes	4 weeks	NH₄	20 µM					/	/
					PO₄	2 µM					Increase	Increase in Pgross and Respiration
					NH₄ / PO₄	20 µM / 2 µM	10:1				Increase	/
Béraud et al. 2013	Exp	Turbinaria reniformis		4 weeks	NH₄	3 µM	> 6:1			Decrease	Increase	/
				5 weeks	NH₄	3 µM	> 6:1	+ 5 °C (additional 7 days)	5	Decrease (temperature)	reduced loss (compared to temp)	Decrease (temperature)
Fabricius et al. 2013	Exp	Acropora millepora		70 days total	NO₃	4 µM						/	/
								+ 4°C (23 days)	12			/	/
		Montipora tuberculosa		90 days total	NO₃	4 µM						/	/
								+ 4°C (49 days)	28			/	/
Jessen et al. 2013	In situ	Acropora hemprichii		16 weeks	DIN / PO₄	1.3 µM / 0.1 µM	13:1			/	/	/
Wiedenmann et al. 2013	Exp	Montipora foliosa		> 5 weeks	LN/LP	0.7 µM / 0.006 µM	116:1					Fv/Fm > 0.5
					HN/HP	6.5 μM / 0.3 μM	21:1			Increase		Fv/Fm > 0.5
					HN/AP	> 3 μM / 0.07 μM	> 42:1			Increase		Fv/Fm < 0.5
		Euphyllia paradivisia		3 weeks	HN/HP	6.5 μM / 0.3 μM	21:1					Fv/Fm > 0.5
					HN/AP	> 3 μM / 0.07 μM	> 42:1			Decrease	Decrease	Fv/Fm > 0.5
		Acropora polystoma		> 5 weeks	HN/HP	6.5 μM / 0.3 μM	21:1
					HN/HP	6.5 μM / 0.3 μM	21:1	+ 6 °C and light (additional 9 days)	7	Decrease		slight decrease
					HN/AP	> 3 μM / 0.07 μM	> 42:1					Decrease in Fv/Fm
					HN/AP	> 3 μM / 0.07 μM	> 42:1	+ 6 °C and light (additional 9 days)	7	Decrease		slight further decrease
		Acropora microphthalma		3 weeks	HN/HP	6.5 μM / 0.3 μM	21:1	+ 9 °C and light					/
					HN/AP	> 3 μM / 0.07 μM	> 42:1	+ 9 °C and light					Decrease (100 % mortality)
Tanaka et al. 2014	Exp	Acropora tenuis		25 days	NO₃/NO₂/NH₄/PO₄	4.8 µM/0.11 µM/0.14 µM/0.28 µM	18:1			Increase	Increase
								+ 4 °C (additional 7 days)	4	decrease (temperature)	/
Ezzat et al. 2015	Exp	Stylophora pistillata		3 weeks	NO₃	3 µM	60:1			Increase	Increase	Decrease in photosynthesis rates
					NH₄	3 μM	60:1			Increase	Increase	/
					NH₄ / PO₄	3 μM / 1 μM	3:1			Increase	Increase	Decrease in photosynthesis rates
Higuchi et al. 2015	Exp	Montipora digitata		3 days	NO₃	10 µM				/		/
								+ 5 °C	2.5	Decrease		Decrease in Fv/Fm
				6 days	NO₃	10 µM				/		/
								+ 5 °C	5	Decrease (temperature)		Decrease in Fv/Fm
Ezzat, Towle et al. 2016	Exp	Turbinaria reniformis		3 weeks	NO₃	2.5 μM	25:1				/	/
								+ 5 °C (additional 7 days)	5	/	/	/
					NO₃ / PO₄	2.5 μM / 0.6 μM	4.2:1				Increase per SA	Increase in Pnet
								+ 5 °C (additional 7 days)	5	/	Increase per SA	/
Hoadley et al. 2016	Exp	Turbinaria reniformis		33 days	NO₃ / PO₄	3.5 µM / 0.3 µM	11.5:1			/	/	/
								+ 5 °C	23	Decrease (temperature)	Increase (temperature)	Decrease in Fv/Fm
Rosset et al. 2017	Exp	Euphyllia paradivisa		6 months	LN/LP	0.7 µM / 0.006 µM	117:1
					HN/HP	6.5 mM / 0.3 µM	22:1			Increase compared to LN/LP
					HN/LP	38 µM / 0.18	211:1			Lower than HN/HP and LN/HP		Decrease in Fv/Fm compared to all other treatments
					LN/HP	0.06 mM / 3.6 µM	1:60			Increase compared to LN/LP
Tanaka et al. 2017	Exp	Montipora digitata		2 months	NO₃	1.86 µM	93:1				Increase
					NO₃ / PO₄	1.37 µM / 0.12 µM	11:1				Increase
		Porites cylindrica		2 months	NO₃	1.73 µM	58:1				Increase
					NO₃ / PO₄	1.46 µM / 0.12 µM	12:1				Increase
Hall et al. 2018	Exp	Stylophora pistillata		30 days	NO₃ / PO₄	1 µM / 0.0625 µM	16:1			Increase	/	/
								+ 5 °C	23	Increase	/	Decrease in Fv/Fm (temperature)
Hadjioannou et al. 2019	In situ	Cladocora caespitosa		6 weeks	NO₃ / NH₄	6 - 7 µM / 5 - 6 µM	65:1			Decrease	/	Decrease in Pgross
								+ 7 °C (last 10 days)	8	Decrease	/	/
								+ 12 °C (last 10 days)	17	Decrease	/	Increase in Pgross
McCauley & Goulet 2019	Exp	Pseudoplexaura porosa	yes	7 days	NH₄	10 µM				Increase	Increase	/
						50 μM				/	/	Decrease in Fv/Fm (at dusk)
					PO₄	4 µM				/	/	Decrease in Fv/Fm (at dusk)
		Eunicea tourneforti	yes	7 days	NH₄	10 µM				Increase	Increase	Increase in Fv/Fm (at noon)
						50 μM				/	/	/
					PO₄	4 µM				/	/	/
Marangoni et al. 2020	Exp	Stylophora pistillata		5 weeks	NO₃	3 μM	17:1			/	/	Decrease in Fᵥ / Fm (after 3 weeks)
								+ 5 °C (last 2 weeks)	10	Decrease	Decrease	Decrease in Fᵥ / Fm
					NH₄	3 μM	17:1			Increase	Increase	/
								+ 5 °C (last 2 weeks)	10	/	/	Decrease in Fᵥ / Fm
Dobson et al. 2021	Exp	Acropora millepora		30 days	NO₃ / PO₄	3.56 μM / 0.31 µM	11.5:1				/	/
								+ 3.5 °C	14		Increase (compared to low nutrients + temperature)	/
		Turbinaria reniformis		30 days	NO₃ / PO₄	3.56 μM / 0.31 µM	11.5:1				/	/
								+ 3.5 °C	14		/	/
Klinke et al. 2022	Exp	Xenia umbellata	yes	5 weeks	PO₄	2 µM				/	/		/
								+ 6 °C (last 3 weeks)		/	/		/
						8 µM				/	/		/
								+ 6 °C (last 3 weeks)		/	/		/
Ning et al. 2022	Exp	Acropora millepora		1 week	NO₃/NH₄/PO₄	19 µM / 34 µM / 0.5 µM	11.1:1			/
						103 µM / 32 µM / 1.5 µM	13.1:1			/
						191 µM / 32 µM / 3.9 µM	26.5:1			Increase
						318 µM / 30 µM / 8.1 µM	39.4:1			/
		Platygyra crosslandi		1 week	NO₃/NH₄/PO₄	19 µM / 34 µM / 0.5 µM	11.1:1			/
						103 µM / 32 µM / 1.5 µM	13.1:1			/
						191 µM / 32 µM / 3.9 µM	26.5:1			/
						318 µM / 30 µM / 8.1 µM	39.4:1			Decrease
Thobor et al. 2022	Exp	Xenia umbellata	yes	5 weeks	NO₃	6 µM				/	/		/
								+ 6 °C (last 3 weeks)	18	/	/		/
						37 µM				/	Increase		/
								+ 6 °C (last 3 weeks)	18	/	/		Decrease
Blackaert et al. 2023c	Exp	Turbinaria reniformis		5 weeks	NO₃ / PO₄	0.5 µM / 0.2 µM	2.5:1 (control)			/	/	/
						0.5 µM / 1 µM	0.5:1			Decrease	/	/
						3 µM / 0.2 µM	15:1			/	/	Decrease
						3 µM /1 µM	3:1			/	Increase	/
		Sarcophyton glaucum	yes	5 weeks	NO₃ / PO₄	0.5 µM / 0.2 µM	2.5:1 (control)			/	/	/
						0.5 µM / 1 µM	0.5:1			/	/	/
						3 µM / 0.2 µM	15:1			/	/	/
						3 µM /1 µM	3:1			/	/	Increase
Pupier et al. 2024	Exp	Heteroxenia fuscescens	yes	10 weeks	NO₃/NH₄/PO₄ (deplete)	0.51 µM / 0.1 µM / 0.17 mM	3.6:1			/	/	/
								+ 5 °C (last 3 weeks)	15	Decrease (temperature)	Decrease (temperature)	Decrease
		Stylophora pistillata		10 weeks	NO₃/NH₄/PO₄ (deplete)	0.51 µM / 0.1 µM / 0.17 mM	3.6:1			/	/	/
								+ 5 °C (last 3 weeks)	15	/	/	/
