# Supplementary material for: Differential responses of hard coral Montipora digitata and soft coral Xenia umbellata to nutrient stoichiometry under heat stress
Source: PeerJ. 2025 Nov 13;13:e20273. doi: 10.7717/peerj.20273 (PMC12619941; doi:10.7717/peerj.20273)
Supplement: Supplemental Information 2 [file peerj-13-20273-s002.xlsx]

## Sheet: Survival
Tank	Species	Treatment	SampleID	Survival_Time	Status
1	xenia	HN/HP	X-1-1	20	1
1	xenia	HN/HP	X-1-2	20	1
1	xenia	HN/HP	X-1-3	20	1
1	xenia	HN/HP	X-1-4	21	1
1	xenia	HN/HP	X-1-5	26	1
1	xenia	HN/HP	X-1-6	27	1
1	xenia	HN/HP	X-1-7	0	0
1	xenia	HN/HP	X-1-8	1	0
1	xenia	HN/HP	X-1-9	3	0
1	xenia	HN/HP	X-1-10	6	0
1	xenia	HN/HP	X-1-11	13	0
1	xenia	HN/HP	X-1-12	20	0
2	xenia	LN/LP	X-2-1	0	0
2	xenia	LN/LP	X-2-2	1	0
2	xenia	LN/LP	X-2-3	3	0
2	xenia	LN/LP	X-2-4	6	0
2	xenia	LN/LP	X-2-5	13	0
2	xenia	LN/LP	X-2-6	20	0
2	xenia	LN/LP	X-2-7	27	0
2	xenia	LN/LP	X-2-8	34	0
2	xenia	LN/LP	X-2-9	35	0
2	xenia	LN/LP	X-2-10	35	0
2	xenia	LN/LP	X-2-11	35	0
2	xenia	LN/LP	X-2-12	35	0
3	xenia	HN/MP	X-3-1	0	0
3	xenia	HN/MP	X-3-2	1	0
3	xenia	HN/MP	X-3-3	3	0
3	xenia	HN/MP	X-3-4	6	0
3	xenia	HN/MP	X-3-5	13	0
3	xenia	HN/MP	X-3-6	20	0
3	xenia	HN/MP	X-3-7	27	0
3	xenia	HN/MP	X-3-8	34	0
3	xenia	HN/MP	X-3-9	12	1
3	xenia	HN/MP	X-3-10	13	1
3	xenia	HN/MP	X-3-11	35	1
3	xenia	HN/MP	X-3-12	35	0
4	xenia	HN/MP	X-4-1	0	0
4	xenia	HN/MP	X-4-2	1	0
4	xenia	HN/MP	X-4-3	3	0
4	xenia	HN/MP	X-4-4	6	0
4	xenia	HN/MP	X-4-5	13	0
4	xenia	HN/MP	X-4-6	20	0
4	xenia	HN/MP	X-4-7	27	0
4	xenia	HN/MP	X-4-8	34	0
4	xenia	HN/MP	X-4-9	35	0
4	xenia	HN/MP	X-4-10	35	0
4	xenia	HN/MP	X-4-11	35	0
4	xenia	HN/MP	X-4-12	35	0
5	xenia	HN/MP	X-5-1	0	0
5	xenia	HN/MP	X-5-2	1	0
5	xenia	HN/MP	X-5-3	3	0
5	xenia	HN/MP	X-5-4	6	0
5	xenia	HN/MP	X-5-5	13	0
5	xenia	HN/MP	X-5-6	20	0
5	xenia	HN/MP	X-5-7	27	0
5	xenia	HN/MP	X-5-8	34	0
5	xenia	HN/MP	X-5-9	13	1
5	xenia	HN/MP	X-5-10	35	0
5	xenia	HN/MP	X-5-11	35	0
5	xenia	HN/MP	X-5-12	35	0
6	xenia	LN/LP	X-6-1	0	0
6	xenia	LN/LP	X-6-2	1	0
6	xenia	LN/LP	X-6-3	3	0
6	xenia	LN/LP	X-6-4	6	0
6	xenia	LN/LP	X-6-5	13	0
6	xenia	LN/LP	X-6-6	20	0
6	xenia	LN/LP	X-6-7	27	0
6	xenia	LN/LP	X-6-8	34	0
6	xenia	LN/LP	X-6-9	35	0
6	xenia	LN/LP	X-6-10	35	0
6	xenia	LN/LP	X-6-11	35	0
6	xenia	LN/LP	X-6-12	35	0
6	xenia	LN/LP	X-6-13	35	0
6	xenia	LN/LP	X-6-14	35	0
7	xenia	HN/HP	X-7-1	12	1
7	xenia	HN/HP	X-7-2	12	1
7	xenia	HN/HP	X-7-3	13	1
7	xenia	HN/HP	X-7-4	14	1
7	xenia	HN/HP	X-7-5	14	1
7	xenia	HN/HP	X-7-6	14	1
7	xenia	HN/HP	X-7-7	14	1
7	xenia	HN/HP	X-7-8	16	1
7	xenia	HN/HP	X-7-9	16	1
7	xenia	HN/HP	X-7-10	20	1
7	xenia	HN/HP	X-7-11	0	0
7	xenia	HN/HP	X-7-12	1	0
7	xenia	HN/HP	X-7-13	3	0
7	xenia	HN/HP	X-7-14	6	0
7	xenia	HN/HP	X-7-15	13	0
8	xenia	LN/LP	X-8-1	0	0
8	xenia	LN/LP	X-8-2	1	0
8	xenia	LN/LP	X-8-3	3	0
8	xenia	LN/LP	X-8-4	6	0
8	xenia	LN/LP	X-8-5	13	0
8	xenia	LN/LP	X-8-6	20	0
8	xenia	LN/LP	X-8-7	27	0
8	xenia	LN/LP	X-8-8	34	0
8	xenia	LN/LP	X-8-9	35	0
8	xenia	LN/LP	X-8-10	35	0
8	xenia	LN/LP	X-8-11	35	0
8	xenia	LN/LP	X-8-12	35	0
9	xenia	HN/HP	X-9-1	33	1
9	xenia	HN/HP	X-9-2	33	1
9	xenia	HN/HP	X-9-3	0	0
9	xenia	HN/HP	X-9-4	1	0
9	xenia	HN/HP	X-9-5	3	0
9	xenia	HN/HP	X-9-6	6	0
9	xenia	HN/HP	X-9-7	13	0
9	xenia	HN/HP	X-9-8	20	0
9	xenia	HN/HP	X-9-9	27	0
9	xenia	HN/HP	X-9-10	34	0
9	xenia	HN/HP	X-9-11	35	0
9	xenia	HN/HP	X-9-12	35	0
10	xenia	HN/MP	X-10-1	33	1
10	xenia	HN/MP	X-10-2	33	1
10	xenia	HN/MP	X-10-3	33	1
10	xenia	HN/MP	X-10-4	0	0
10	xenia	HN/MP	X-10-5	1	0
10	xenia	HN/MP	X-10-6	3	0
10	xenia	HN/MP	X-10-7	6	0
10	xenia	HN/MP	X-10-8	13	0
10	xenia	HN/MP	X-10-9	20	0
10	xenia	HN/MP	X-10-10	27	0
10	xenia	HN/MP	X-10-11	34	0
10	xenia	HN/MP	X-10-12	35	0
11	xenia	HN/HP	X-11-1	21	1
11	xenia	HN/HP	X-11-2	35	1
11	xenia	HN/HP	X-11-3	35	1
11	xenia	HN/HP	X-11-4	35	1
11	xenia	HN/HP	X-11-5	0	0
11	xenia	HN/HP	X-11-6	1	0
11	xenia	HN/HP	X-11-7	3	0
11	xenia	HN/HP	X-11-8	6	0
11	xenia	HN/HP	X-11-9	13	0
11	xenia	HN/HP	X-11-10	20	0
11	xenia	HN/HP	X-11-11	27	0
11	xenia	HN/HP	X-11-12	34	0
12	xenia	LN/LP	X-12-1	0	0
12	xenia	LN/LP	X-12-2	1	0
12	xenia	LN/LP	X-12-3	3	0
12	xenia	LN/LP	X-12-4	6	0
12	xenia	LN/LP	X-12-5	13	0
12	xenia	LN/LP	X-12-6	20	0
12	xenia	LN/LP	X-12-7	27	0
12	xenia	LN/LP	X-12-8	34	0
12	xenia	LN/LP	X-12-9	35	0
12	xenia	LN/LP	X-12-10	35	0
12	xenia	LN/LP	X-12-11	35	0
12	xenia	LN/LP	X-12-12	35	0
1	monti	HN/HP	M-1-1	30	1
1	monti	HN/HP	M-1-2	30	1
1	monti	HN/HP	M-1-3	31	1
1	monti	HN/HP	M-1-4	31	1
1	monti	HN/HP	M-1-5	0	0
1	monti	HN/HP	M-1-6	1	0
1	monti	HN/HP	M-1-7	3	0
1	monti	HN/HP	M-1-8	6	0
1	monti	HN/HP	M-1-9	13	0
1	monti	HN/HP	M-1-10	20	0
1	monti	HN/HP	M-1-11	27	0
2	monti	LN/LP	M-2-1	0	0
2	monti	LN/LP	M-2-2	1	0
2	monti	LN/LP	M-2-3	3	0
2	monti	LN/LP	M-2-4	6	0
2	monti	LN/LP	M-2-5	13	0
2	monti	LN/LP	M-2-6	20	0
2	monti	LN/LP	M-2-7	27	0
2	monti	LN/LP	M-2-8	34	0
2	monti	LN/LP	M-2-9	35	0
2	monti	LN/LP	M-2-10	35	0
2	monti	LN/LP	M-2-11	35	0
3	monti	HN/MP	M-3-1	28	1
3	monti	HN/MP	M-3-2	28	1
3	monti	HN/MP	M-3-3	31	1
3	monti	HN/MP	M-3-4	33	1
3	monti	HN/MP	M-3-5	0	0
3	monti	HN/MP	M-3-6	1	0
3	monti	HN/MP	M-3-7	3	0
3	monti	HN/MP	M-3-8	6	0
3	monti	HN/MP	M-3-9	13	0
3	monti	HN/MP	M-3-10	20	0
3	monti	HN/MP	M-3-11	27	0
4	monti	HN/MP	M-4-1	28	1
4	monti	HN/MP	M-4-2	35	1
4	monti	HN/MP	M-4-3	35	1
4	monti	HN/MP	M-4-4	0	0
4	monti	HN/MP	M-4-5	1	0
4	monti	HN/MP	M-4-6	3	0
4	monti	HN/MP	M-4-7	6	0
4	monti	HN/MP	M-4-8	13	0
4	monti	HN/MP	M-4-9	20	0
4	monti	HN/MP	M-4-10	27	0
4	monti	HN/MP	M-4-11	34	0
5	monti	HN/MP	M-5-1	30	1
5	monti	HN/MP	M-5-2	31	1
5	monti	HN/MP	M-5-3	33	1
5	monti	HN/MP	M-5-4	35	1
5	monti	HN/MP	M-5-5	0	0
5	monti	HN/MP	M-5-6	1	0
5	monti	HN/MP	M-5-7	3	0
5	monti	HN/MP	M-5-8	6	0
5	monti	HN/MP	M-5-9	13	0
5	monti	HN/MP	M-5-10	20	0
5	monti	HN/MP	M-5-11	27	0
6	monti	LN/LP	M-6-1	0	0
6	monti	LN/LP	M-6-2	1	0
6	monti	LN/LP	M-6-3	3	0
6	monti	LN/LP	M-6-4	6	0
6	monti	LN/LP	M-6-5	13	0
6	monti	LN/LP	M-6-6	20	0
6	monti	LN/LP	M-6-7	27	0
6	monti	LN/LP	M-6-8	34	0
6	monti	LN/LP	M-6-9	35	0
6	monti	LN/LP	M-6-10	35	0
6	monti	LN/LP	M-6-11	35	0
7	monti	HN/HP	M-7-1	28	1
7	monti	HN/HP	M-7-2	31	1
7	monti	HN/HP	M-7-3	31	1
7	monti	HN/HP	M-7-4	0	0
7	monti	HN/HP	M-7-5	1	0
7	monti	HN/HP	M-7-6	3	0
7	monti	HN/HP	M-7-7	6	0
7	monti	HN/HP	M-7-8	13	0
7	monti	HN/HP	M-7-9	20	0
7	monti	HN/HP	M-7-10	27	0
8	monti	LN/LP	M-8-1	0	0
8	monti	LN/LP	M-8-2	1	0
8	monti	LN/LP	M-8-3	3	0
8	monti	LN/LP	M-8-4	6	0
8	monti	LN/LP	M-8-5	13	0
8	monti	LN/LP	M-8-6	20	0
8	monti	LN/LP	M-8-7	27	0
8	monti	LN/LP	M-8-8	34	0
8	monti	LN/LP	M-8-9	35	0
8	monti	LN/LP	M-8-10	35	0
8	monti	LN/LP	M-8-11	35	0
9	monti	HN/HP	M-9-1	31	1
9	monti	HN/HP	M-9-2	31	1
9	monti	HN/HP	M-9-3	31	1
9	monti	HN/HP	M-9-4	31	1
9	monti	HN/HP	M-9-5	0	0
9	monti	HN/HP	M-9-6	1	0
9	monti	HN/HP	M-9-7	3	0
9	monti	HN/HP	M-9-8	6	0
9	monti	HN/HP	M-9-9	13	0
9	monti	HN/HP	M-9-10	20	0
9	monti	HN/HP	M-9-11	27	0
10	monti	HN/MP	M-10-1	31	1
10	monti	HN/MP	M-10-2	31	1
10	monti	HN/MP	M-10-3	31	1
10	monti	HN/MP	M-10-4	0	0
10	monti	HN/MP	M-10-5	1	0
10	monti	HN/MP	M-10-6	3	0
10	monti	HN/MP	M-10-7	6	0
10	monti	HN/MP	M-10-8	13	0
10	monti	HN/MP	M-10-9	20	0
10	monti	HN/MP	M-10-10	27	0
10	monti	HN/MP	M-10-11	35	0
11	monti	HN/HP	M-11-1	31	1
11	monti	HN/HP	M-11-2	31	1
11	monti	HN/HP	M-11-3	33	1
11	monti	HN/HP	M-11-4	33	1
11	monti	HN/HP	M-11-5	0	0
11	monti	HN/HP	M-11-6	1	0
11	monti	HN/HP	M-11-7	3	0
11	monti	HN/HP	M-11-8	6	0
11	monti	HN/HP	M-11-9	13	0
11	monti	HN/HP	M-11-10	20	0
11	monti	HN/HP	M-11-11	27	0
12	monti	LN/LP	M-12-1	0	0
12	monti	LN/LP	M-12-2	1	0
12	monti	LN/LP	M-12-3	3	0
12	monti	LN/LP	M-12-4	6	0
12	monti	LN/LP	M-12-5	13	0
12	monti	LN/LP	M-12-6	20	0
12	monti	LN/LP	M-12-7	27	0
12	monti	LN/LP	M-12-8	34	0
12	monti	LN/LP	M-12-9	35	0
12	monti	LN/LP	M-12-10	35	0
12	monti	LN/LP	M-12-11	35	0

## Sheet: Pulsation
Experimental_Date	Date	Tank	Treatment	polyp1	polyp2	polyp3	Mean_Puls
0	08.11.22	1	8PO4	16	16	16	16
0	08.11.22	2	control	17	16	16	16.3333
0	08.11.22	3	2PO4	16	17	17	16.6667
0	08.11.22	4	2PO4	15	16	16	15.6667
0	08.11.22	5	2PO4	17	16	17	16.6667
0	08.11.22	6	control	18	18	17	17.6667
0	08.11.22	7	8PO4	17	16	17	16.6667
0	08.11.22	8	control	17	16	16	16.3333
0	08.11.22	9	8PO4	18	17	17	17.3333
0	08.11.22	10	2PO4	18	17	18	17.6667
0	08.11.22	11	8PO4	16	17	16	16.3333
0	08.11.22	12	control	16	17	15	16
1	09.11.22	1	8PO4	21	20	20	20.3333
1	09.11.22	2	control	15	17	18	16.6667
1	09.11.22	3	2PO4	20	19	19	19.3333
1	09.11.22	4	2PO4	17	17	20	18
1	09.11.22	5	2PO4	20	19	20	19.6667
1	09.11.22	6	control	19	18	19	18.6667
1	09.11.22	7	8PO4	19	19	20	19.3333
1	09.11.22	8	control	20	19	19	19.3333
1	09.11.22	9	8PO4	19	20	19	19.3333
1	09.11.22	10	2PO4	20	20	20	20
1	09.11.22	11	8PO4	18	18	19	18.3333
1	09.11.22	12	control	20	20	19	19.6667
2	10.11.22	1	8PO4	18	17	18	17.6667
2	10.11.22	2	control	19	19	20	19.3333
2	10.11.22	3	2PO4	20	19	19	19.3333
2	10.11.22	4	2PO4	19	19	16	18
2	10.11.22	5	2PO4	19	19	17	18.3333
2	10.11.22	6	control	21	21	20	20.6667
2	10.11.22	7	8PO4	19	19	20	19.3333
2	10.11.22	8	control	18	19	18	18.3333
2	10.11.22	9	8PO4	20	20	20	20
2	10.11.22	10	2PO4	20	20	20	20
2	10.11.22	11	8PO4	19	18	19	18.6667
2	10.11.22	12	control	20	20	20	20
4	12.11.22	1	8PO4	23	23	21	22.3333
4	12.11.22	2	control	21	21	21	21
4	12.11.22	3	2PO4	19	19	22	20
4	12.11.22	4	2PO4	22	22	21	21.6667
4	12.11.22	5	2PO4	19	20	20	19.6667
4	12.11.22	6	control	22	21	21	21.3333
4	12.11.22	7	8PO4	22	22	21	21.6667
4	12.11.22	8	control	21	22	21	21.3333
4	12.11.22	9	8PO4	20	18	21	19.6667
4	12.11.22	10	2PO4	19	21	20	20
4	12.11.22	11	8PO4	21	21	20	20.6667
4	12.11.22	12	control	21	21	20	20.6667
7	15.11.22	1	8PO4	20	20	21	20.3333
7	15.11.22	2	control	21	19	19	19.6667
7	15.11.22	3	2PO4	21	19	20	20
7	15.11.22	4	2PO4	20	20	21	20.3333
7	15.11.22	5	2PO4	20	17	18	18.3333
7	15.11.22	6	control	21	21	22	21.3333
7	15.11.22	7	8PO4	17	15	19	17
7	15.11.22	8	control	20	20	21	20.3333
7	15.11.22	9	8PO4	19	19	18	18.6667
7	15.11.22	10	2PO4	20	21	17	19.3333
7	15.11.22	11	8PO4	12	12	14	12.6667
7	15.11.22	12	control	19	19	20	19.3333
14	22.11.22	1	8PO4	0	0	0	0
14	22.11.22	2	control	22	22	20	21.3333
14	22.11.22	3	2PO4	0	0	0	0
14	22.11.22	4	2PO4	15	15	17	15.6667
14	22.11.22	5	2PO4	0	0	0	0
14	22.11.22	6	control	18	17	18	17.6667
14	22.11.22	7	8PO4	0	0	0	0
14	22.11.22	8	control	19	20	19	19.3333
14	22.11.22	9	8PO4	0	0	0	0
14	22.11.22	10	2PO4	10	14	13	12.3333
14	22.11.22	11	8PO4	0	0	0	0
14	22.11.22	12	control	19	21	20	20
21	29.11.22	1	8PO4	0	0	0	0
21	29.11.22	2	control	21	20	19	20
21	29.11.22	3	2PO4	20	22	21	21
21	29.11.22	4	2PO4	0	0	0	0
21	29.11.22	5	2PO4	18	17	16	17
21	29.11.22	6	control	22	22	23	22.3333
21	29.11.22	7	8PO4	NA	NA	NA	#DIV/0!
21	29.11.22	8	control	19	19	21	19.6667
21	29.11.22	9	8PO4	0	0	0	0
21	29.11.22	10	2PO4	0	0	0	0
21	29.11.22	11	8PO4	0	0	0	0
21	29.11.22	12	control	19	19	19	19
28	06.10.22	1	8PO4	NA	NA	NA	#DIV/0!
28	06.10.22	2	control	22	21	20	21
28	06.10.22	3	2PO4	14	11	7	10.6667
28	06.10.22	4	2PO4	12	12	25	16.3333
28	06.10.22	5	2PO4	0	0	0	0
28	06.10.22	6	control	23	22	23	22.6667
28	06.10.22	7	8PO4	NA	NA	NA	#DIV/0!
28	06.10.22	8	control	20	21	20	20.3333
28	06.10.22	9	8PO4	0	0	0	0
28	06.10.22	10	2PO4	0	1	0	0.333333
28	06.10.22	11	8PO4	0	0	0	0
28	06.10.22	12	control	20	18	19	19
35	13.12.22	1	8PO4	NA	NA	NA	#DIV/0!
35	13.12.22	2	control	16	17	17	16.6667
35	13.12.22	3	2PO4	0	0	0	0
35	13.12.22	4	2PO4	0	0	0	0
35	13.12.22	5	2PO4	0	0	0	0
35	13.12.22	6	control	14	15	16	15
35	13.12.22	7	8PO4	NA	NA	NA	#DIV/0!
35	13.12.22	8	control	18	16	18	17.3333
35	13.12.22	9	8PO4	0	0	0	0
35	13.12.22	10	2PO4	0	0	0	0
35	13.12.22	11	8PO4	0	0	0	0
35	13.12.22	12	control	13	16	13	14

## Sheet: Symbiodiniaceae
Day	Treatment	Tank	Species	Mean_Zoox_Density
0	8PO4	1	X. umbellata	89828.7
0	control	2	X. umbellata	200196
0	2PO4	3	X. umbellata	39064.1
0	2PO4	4	X. umbellata	45470.5
0	2PO4	5	X. umbellata	17310.6
0	control	6	X. umbellata	49216.1
0	8PO4	7	X. umbellata	53090
0	control	8	X. umbellata	31783.1
0	8PO4	9	X. umbellata	74099.6
0	2PO4	10	X. umbellata	114267
0	8PO4	11	X. umbellata	118622
0	control	12	X. umbellata	172977
4	8PO4	1	X. umbellata	160836
4	control	2	X. umbellata	185758
4	2PO4	3	X. umbellata	120338
4	2PO4	4	X. umbellata	238070
4	2PO4	5	X. umbellata	183109
4	control	6	X. umbellata	128430
4	8PO4	7	X. umbellata	136779
4	control	8	X. umbellata	160866
4	8PO4	9	X. umbellata	118132
4	2PO4	10	X. umbellata	92222.9
4	8PO4	11	X. umbellata	126733
4	control	12	X. umbellata	132207
7	8PO4	1	X. umbellata	6203.66
7	control	2	X. umbellata	9162.96
7	2PO4	3	X. umbellata	6603.63
7	2PO4	4	X. umbellata	9690.69
7	2PO4	5	X. umbellata	8758.86
7	control	6	X. umbellata	91945
7	8PO4	7	X. umbellata	2886.2
7	control	8	X. umbellata	7395.04
7	8PO4	9	X. umbellata	3706.6
7	2PO4	10	X. umbellata	3766.92
7	8PO4	11	X. umbellata	605.769
7	control	12	X. umbellata	10195
14	8PO4	1	X. umbellata	70901.6
14	control	2	X. umbellata	24954.8
14	2PO4	3	X. umbellata	14462.1
14	2PO4	4	X. umbellata	18423.6
14	2PO4	5	X. umbellata	12004.9
14	control	6	X. umbellata	4731.54
14	8PO4	7	X. umbellata	18930.2
14	control	8	X. umbellata	13463.2
14	8PO4	9	X. umbellata	7233.77
14	2PO4	10	X. umbellata	1285.81
14	8PO4	11	X. umbellata	21360.1
14	control	12	X. umbellata	9329.43
21	8PO4	1	X. umbellata	17992
21	control	2	X. umbellata	13065.2
21	2PO4	3	X. umbellata	6124.76
21	2PO4	4	X. umbellata	18226.4
21	2PO4	5	X. umbellata	3763.97
21	control	6	X. umbellata	2683.95
21	8PO4	7	X. umbellata	NA
21	control	8	X. umbellata	16185.2
21	8PO4	9	X. umbellata	12160.2
21	2PO4	10	X. umbellata	6819.92
21	8PO4	11	X. umbellata	10560.8
21	control	12	X. umbellata	2107.71
35	8PO4	1	X. umbellata	nA
35	control	2	X. umbellata	24813.5
35	2PO4	3	X. umbellata	22034.9
35	2PO4	4	X. umbellata	6320.5
35	2PO4	5	X. umbellata	8623.99
35	control	6	X. umbellata	5211.17
35	8PO4	7	X. umbellata	nA
35	control	8	X. umbellata	2120.45
35	8PO4	9	X. umbellata	22043.2
35	2PO4	10	X. umbellata	12552.8
35	8PO4	11	X. umbellata	37205.9
35	control	12	X. umbellata	7747.83
0	8PO4	1	M. digitata	63212.3
0	control	2	M. digitata	100380
0	2PO4	3	M. digitata	190280
0	2PO4	4	M. digitata	78911.6
0	2PO4	5	M. digitata	205369
0	control	6	M. digitata	304547
0	8PO4	7	M. digitata	29501.5
0	control	8	M. digitata	117237
0	8PO4	9	M. digitata	42436.5
0	2PO4	10	M. digitata	26236.6
0	8PO4	11	M. digitata	80261
0	control	12	M. digitata	67393.2
4	8PO4	1	M. digitata	239232
4	control	2	M. digitata	271601
4	2PO4	3	M. digitata	263636
4	2PO4	4	M. digitata	203025
4	2PO4	5	M. digitata	231592
4	control	6	M. digitata	138560
4	8PO4	7	M. digitata	247788
4	control	8	M. digitata	141593
4	8PO4	9	M. digitata	175030
4	2PO4	10	M. digitata	156307
4	8PO4	11	M. digitata	169397
4	control	12	M. digitata	90207.4
7	8PO4	1	M. digitata	84603.7
7	control	2	M. digitata	32637.8
7	2PO4	3	M. digitata	96137.5
7	2PO4	4	M. digitata	41477.3
7	2PO4	5	M. digitata	45665
7	control	6	M. digitata	13841.8
7	8PO4	7	M. digitata	84204.5
7	control	8	M. digitata	18702.7
7	8PO4	9	M. digitata	53097.3
7	2PO4	10	M. digitata	50403.2
7	8PO4	11	M. digitata	80033.6
7	control	12	M. digitata	43816.3
14	8PO4	1	M. digitata	92665.3
14	control	2	M. digitata	57449.5
14	2PO4	3	M. digitata	69293.5
14	2PO4	4	M. digitata	139969
14	2PO4	5	M. digitata	137353
14	control	6	M. digitata	89488.6
14	8PO4	7	M. digitata	146106
14	control	8	M. digitata	103563
14	8PO4	9	M. digitata	136863
14	2PO4	10	M. digitata	162879
14	8PO4	11	M. digitata	83407.1
14	control	12	M. digitata	43391
21	8PO4	1	M. digitata	24883.4
21	control	2	M. digitata	44718
21	2PO4	3	M. digitata	18113.8
21	2PO4	4	M. digitata	42372.9
21	2PO4	5	M. digitata	114050
21	control	6	M. digitata	7223.62
21	8PO4	7	M. digitata	24621.2
21	control	8	M. digitata	3060.26
21	8PO4	9	M. digitata	25510.2
21	2PO4	10	M. digitata	49318.2
21	8PO4	11	M. digitata	31960.2
21	control	12	M. digitata	104669
35	8PO4	1	M. digitata	nA
35	control	2	M. digitata	19819.8
35	2PO4	3	M. digitata	nA
35	2PO4	4	M. digitata	34246.6
35	2PO4	5	M. digitata	nA
35	control	6	M. digitata	31321
35	8PO4	7	M. digitata	nA
35	control	8	M. digitata	53135.2
35	8PO4	9	M. digitata	nA
35	2PO4	10	M. digitata	25815
35	8PO4	11	M. digitata	nA
35	control	12	M. digitata	25844.6

## Sheet: Chl a
Experimental_Date	Treatment	Tank	Species	Surface area cm2	Sample Volume (mL)	Mean_Chla_(pg/algal cell)	Mean_Zoox_Density	Mean_Chla_(pg/cm)
0	8PO4	1	X. umbellata	22.1116	10	59.3463	89828.7	241095
0	control	2	X. umbellata	19.9503	10.5	26.2552	200196	263463
0	2PO4	3	X. umbellata	26.6004	10.6	30.3945	39064.1	44635.8
0	2PO4	4	X. umbellata	29.2605	10.6	45.0548	45470.5	70014.8
0	2PO4	5	X. umbellata	29.2605	10.4	85.1259	17310.6	50360.7
0	control	6	X. umbellata	45.2207	11	18.8697	49216.1	20536.9
0	8PO4	7	X. umbellata	29.7592	11	27.8	53090	49594.8
0	control	8	X. umbellata	39.0694	11.7	41.9447	31783.1	34122.2
0	8PO4	9	X. umbellata	28.7617	10.5	71.2739	74099.6	183625
0	2PO4	10	X. umbellata	31.7543	10.9	33.2035	114267	119482
0	8PO4	11	X. umbellata	31.4218	10.6	20.2106	118622	76298.3
0	control	12	X. umbellata	37.9056	11.5	25.656	172977	117078
0	8PO4	1	M. digitata	8.95	14.6	68.9318	63212.3	486853
0	control	2	M. digitata	12.16	15.5	16.9476	100380	139902
0	2PO4	3	M. digitata	11.06	13.8	25.1866	190280	433320
0	2PO4	4	M. digitata	7.35	14.5	48.2634	78911.6	518169
0	2PO4	5	M. digitata	8.94	13.6	13.8377	205369	317880
0	control	6	M. digitata	6.13	14.5	13.5767	304547	674509
0	8PO4	7	M. digitata	9.83	14.5	114.269	29501.5	342942
0	control	8	M. digitata	9.5	13.5	38.4146	117237	474064
0	8PO4	9	M. digitata	10.23	15.1	35.4304	42436.5	146974
0	2PO4	10	M. digitata	11.22	15.7	247.61	26236.6	579006
0	8PO4	11	M. digitata	6.13	16.4	44.4705	80261	582259
0	control	12	M. digitata	8.66	16.1	65.4521	67393.2	509357
4	8PO4	1	X. umbellata	31.9205	10.2	47.5777	160836	239727
4	control	2	X. umbellata	27.2654	10.7	20.5169	185758	139780
4	2PO4	3	X. umbellata	35.7443	10.9	23.5213	120338	79187.6
4	2PO4	4	X. umbellata	39.0694	11	13.3057	238070	81078.3
4	2PO4	5	X. umbellata	49.5433	10.8	14.061	183109	51968.5
4	control	6	X. umbellata	31.7543	10.5	21.0302	128430	85056.3
4	8PO4	7	X. umbellata	32.918	10.7	24.9182	136779	103538
4	control	8	X. umbellata	39.7344	10.9	23.666	160866	95812.6
4	8PO4	9	X. umbellata	31.9205	10.8	28.0205	118132	103698
4	2PO4	10	X. umbellata	41.2307	10.7	25.9793	92222.9	58109.5
4	8PO4	11	X. umbellata	22.4441	10.4	23.0809	126733	130329
4	control	12	X. umbellata	31.0893	10.7	22.1306	132207	94109.9
4	8PO4	1	M. digitata	3.97	13.1	24.1821	239232	1.45721e+06
4	control	2	M. digitata	4.34	23	19.7483	271601	1.23587e+06
4	2PO4	3	M. digitata	3.63	13.2	33.0055	263636	2.39709e+06
4	2PO4	4	M. digitata	6.28	15	40.0447	203025	1.2946e+06
4	2PO4	5	M. digitata	3.11	13.4	57.0102	231592	4.24537e+06
4	control	6	M. digitata	6.13	15.1	22.3822	138560	505920
4	8PO4	7	M. digitata	4.52	14	67.8487	247788	3.71949e+06
4	control	8	M. digitata	5.65	12.8	30.0528	141593	753144
4	8PO4	9	M. digitata	4.15	14.9	15.76	175030	664693
4	2PO4	10	M. digitata	5.51	13	17.6921	156307	501886
4	8PO4	11	M. digitata	7.54	13.1	28.6164	169397	642907
4	control	12	M. digitata	4.34	10.8	39.1531	90207.4	813802
7	8PO4	1	X. umbellata	38.0719	10.5	167.428	6203.66	27281.7
7	control	2	X. umbellata	23.6079	10.5	85.16	9162.96	33053.3
7	2PO4	3	X. umbellata	35.4118	10.7	84.2767	6603.63	15716
7	2PO4	4	X. umbellata	28.263	10.2	78.1324	9690.69	26789.7
7	2PO4	5	X. umbellata	38.9031	10.7	100.069	8758.86	22530
7	control	6	X. umbellata	25.7692	10.2	9.91276	91945	35369
7	8PO4	7	X. umbellata	29.2605	10.4	399.25	2886.2	39381.3
7	control	8	X. umbellata	53.8659	11	126.021	7395.04	17301
7	8PO4	9	X. umbellata	38.2381	10.8	353.6	3706.6	34276.1
7	2PO4	10	X. umbellata	31.9205	10.7	147.705	3766.92	17430.5
7	8PO4	11	X. umbellata	32.4193	10.5	385.467	605.769	7202.62
7	control	12	X. umbellata	22.9429	10.4	33.7867	10195	15013.6
7	8PO4	1	M. digitata	8.2	15	24.3016	84603.7	250732
7	control	2	M. digitata	6.53	15.5	58.6764	32637.8	293272
7	2PO4	3	M. digitata	5.89	15.1	15.3427	96137.5	250425
7	2PO4	4	M. digitata	5.72	14.6	73.2985	41477.3	531507
7	2PO4	5	M. digitata	5.94	15.5	72.9143	45665	560544
7	control	6	M. digitata	5.31	14.7	173.24	13841.8	451592
7	8PO4	7	M. digitata	4.4	15.6	35.8884	84204.5	686811
7	control	8	M. digitata	5.28	15.8	148.016	18702.7	524298
7	8PO4	9	M. digitata	4.52	16	28.1	53097.3	330096
7	2PO4	10	M. digitata	6.82	25	36.2291	50403.2	267751
7	8PO4	11	M. digitata	8.94	15.9	17.4	80033.6	155770
7	control	12	M. digitata	4.71	12.7	56.4954	43816.3	525567
14	8PO4	1	X. umbellata	18.6203	9.7	11.5979	70901.6	44162.2
14	control	2	X. umbellata	27.2654	11	13.5161	24954.8	12370.6
14	2PO4	3	X. umbellata	21.1141	10.4	30.0221	14462.1	20563.7
14	2PO4	4	X. umbellata	27.0992	10.8	30.2245	18423.6	20548.4
14	2PO4	5	X. umbellata	25.6029	10.7	37.4258	12004.9	17548.4
14	control	6	X. umbellata	24.9379	10.5	39.0892	4731.54	7416.51
14	8PO4	7	X. umbellata	15.6278	10.3	37.935	18930.2	45951.5
14	control	8	X. umbellata	32.7518	10.7	34.153	13463.2	14039.2
14	8PO4	9	X. umbellata	36.2431	10.5	50.82	7233.77	10143.2
14	2PO4	10	X. umbellata	37.0744	10.9	380.61	1285.81	13200.3
14	8PO4	11	X. umbellata	23.1091	10.4	20.9112	21360.1	19328.5
14	control	12	X. umbellata	41.2307	11	28.6474	9329.43	6482.15
14	8PO4	1	M. digitata	4.84	13.8	48	92665.3	918995
14	control	2	M. digitata	5.94	9.1	54.7413	57449.5	529438
14	2PO4	3	M. digitata	3.68	8.5	99.54	69293.5	1.87431e+06
14	2PO4	4	M. digitata	5.72	10.5	43.322	139969	1.0601e+06
14	2PO4	5	M. digitata	5.09	11.9	36.4357	137353	983211
14	control	6	M. digitata	5.28	12.6	45.536	89488.6	771772
14	8PO4	7	M. digitata	5.65	12.7	37.4592	146106	968677
14	control	8	M. digitata	4.49	12	43.5677	103563	1.00491e+06
14	8PO4	9	M. digitata	4.32	11	14.3451	136863	454473
14	2PO4	10	M. digitata	3.3	10	40.0149	162879	1.97502e+06
14	8PO4	11	M. digitata	5.65	13	35.9034	83407.1	530018
14	control	12	M. digitata	5.92	13.7	58.9813	43391	432308
21	8PO4	1	X. umbellata	19.7841	10	2885.22	17992	2.62387e+06
21	control	2	X. umbellata	25.6029	10.5	40.8335	13065.2	20837.5
21	2PO4	3	X. umbellata	28.0967	10.6	107.133	6124.76	23353.8
21	2PO4	4	X. umbellata	28.5955	10.7	45.4215	18226.4	28951.2
21	2PO4	5	X. umbellata	32.253	10.8	139.84	3763.97	16319.5
21	control	6	X. umbellata	38.7369	10.4	162.871	2683.95	11284.8
21	8PO4	7	X. umbellata	NA	nA	nA	NA	#VALUE!
21	control	8	X. umbellata	36.7418	10.7	33.688	16185.2	14839.9
21	8PO4	9	X. umbellata	19.9503	10.5	20.2016	12160.2	12313.4
21	2PO4	10	X. umbellata	31.9205	10.9	57.2128	6819.92	12223.7
21	8PO4	11	X. umbellata	21.1141	10.2	34.3927	10560.8	17202.5
21	control	12	X. umbellata	31.0893	10.5	50.09	2107.71	3395.88
21	8PO4	1	M. digitata	4.29	12.2	93.4114	24883.4	541818
21	control	2	M. digitata	5.94	12.5	31.1976	44718	234865
21	2PO4	3	M. digitata	6.68	8.8	225.505	18113.8	611490
21	2PO4	4	M. digitata	5.31	10	113.498	42372.9	905693
21	2PO4	5	M. digitata	4.84	13.8	34.9237	114050	822942
21	control	6	M. digitata	5.97	11.5	184.253	7223.62	222944
21	8PO4	7	M. digitata	6.6	10	126.889	24621.2	473359
21	control	8	M. digitata	5.31	13	622.4	3060.26	358702
21	8PO4	9	M. digitata	4.9	10	59.316	25510.2	308809
21	2PO4	10	M. digitata	4.4	12.4	41.4857	49318.2	465000
21	8PO4	11	M. digitata	5.28	13.5	65.756	31960.2	398026
21	control	12	M. digitata	4.15	13.9	33.928	104669	855711
35	8PO4	1	X. umbellata	NA	nA	nA	nA	nA
35	control	2	X. umbellata	18.6203	10	13.5273	24813.5	18026.5
35	2PO4	3	X. umbellata	35.9106	10.3	27.3251	22034.9	16766.8
35	2PO4	4	X. umbellata	54.8634	10.1	51.1015	6320.5	5887.11
35	2PO4	5	X. umbellata	32.5855	10	40.5093	8623.99	10721.1
35	control	6	X. umbellata	31.7543	10.6	21.7741	5211.17	3573.34
35	8PO4	7	X. umbellata	NA	nA	nA	nA	nA
35	control	8	X. umbellata	46.3845	10.5	31.152	2120.45	1424.1
35	8PO4	9	X. umbellata	16.6253	10.3	49.0102	22043.2	64981.9
35	2PO4	10	X. umbellata	22.1116	10.1	48.7614	12552.8	27681.9
35	8PO4	11	X. umbellata	17.2903	10	18.2909	37205.9	39359.1
35	control	12	X. umbellata	19.2853	10.4	26.42	7747.83	10614.2
35	8PO4	1	M. digitata	nA	nA	nA	nA	nA
35	control	2	M. digitata	9.99	14.4	8.84873	19819.8	17555.6
35	2PO4	3	M. digitata	nA	nA	nA	nA	nA
35	2PO4	4	M. digitata	5.11	10	11.6583	34246.6	78132.4
35	2PO4	5	M. digitata	5.94	nA	nA	nA	nA
35	control	6	M. digitata	7.04	14.7	11.7933	31321	52468.6
35	8PO4	7	M. digitata	nA	nA	nA	nA	nA
35	control	8	M. digitata	6.14	14.5	9.314	53135.2	80602.8
35	8PO4	9	M. digitata	nA	nA	nA	nA	nA
35	2PO4	10	M. digitata	5.31667	12.2	9.916	25815	48147.1
35	8PO4	11	M. digitata	nA	nA	nA	nA	nA
35	control	12	M. digitata	5.18	15.3	10.3389	25844.6	51583.7
